# Supplementary material for: First-principles calculation of 11B solid-state NMR parameters of boron-rich compounds II: the orthorhombic phases MgB7 and MgB12C2 and the boron modification γ-B28
Source: Royal Society of Chemistry journal article supplement (doi:10.1039/d0cp06073a), 2021-01-01
Supplement: d0cp06073a1.pdf [file d0cp06073a1.pdf]

*Supporting Information for*

**First-Principles Calculation of  $^{11}\text{B}$  Solid-State NMR  
Parameters of Boron-Rich Compounds II: The  
Orthorhombic Phases  $\text{MgB}_7$  and  $\text{MgB}_{12}\text{C}_2$  and the  
Boron Modification  $\gamma\text{-B}_{28}$**

Martin Ludwig<sup>a</sup> and Harald Hillebrecht<sup>a,\*</sup>

<sup>a</sup> *Institut für Anorganische und Analytische Chemie,  
Albert-Ludwigs-Universität 79104 Freiburg, Germany*

\* E-mail: [harald.hillebrecht@ac.uni-freiburg.de](mailto:harald.hillebrecht@ac.uni-freiburg.de);  
Phone: +49 (0)761 2036131;  
Fax: +49 (0)761 2036012

Table S1: Lattice parameters of primitive cells used for the calculations.<sup>a</sup>

| compound                           | length (Å) |          |          | angles (°) |         |          | volume (Å <sup>3</sup> ) |
|------------------------------------|------------|----------|----------|------------|---------|----------|--------------------------|
|                                    | <i>a</i>   | <i>b</i> | <i>c</i> | $\alpha$   | $\beta$ | $\gamma$ |                          |
| MgB <sub>7</sub>                   | 10.4782    | 5.9769   | 7.2719   | 65.735     | 43.908  | 90.000   | 254.4                    |
| o-MgB <sub>12</sub> C <sub>2</sub> | 5.6133     | 9.8280   | 6.9107   | 44.678     | 66.038  | 90.000   | 218.8                    |

<sup>a</sup> for  $\gamma$ -B<sub>28</sub> lattice parameters of primitive cell correspond to conventional orthorhombic cell.

Table S2: Structure parameters in terms of the orthorhombic axes before and after relaxation.

| compound                           | site       | Wyckoff position | start     |           |           | relaxed   |           |           |
|------------------------------------|------------|------------------|-----------|-----------|-----------|-----------|-----------|-----------|
|                                    |            |                  | $\bar{x}$ | $\bar{y}$ | $\bar{z}$ | $\bar{x}$ | $\bar{y}$ | $\bar{z}$ |
| MgB <sub>7</sub>                   | B(1)       | 8 <i>i</i>       | 0.58356   | 0.75000   | 0.22495   | 0.58384   | 0.75000   | 0.22560   |
|                                    | B(2)       | 16 <i>j</i>      | 0.68650   | 0.59402   | 0.08645   | 0.68641   | 0.59432   | 0.08680   |
|                                    | B(3)       | 16 <i>j</i>      | 0.82803   | 0.50276   | 0.20540   | 0.82772   | 0.50337   | 0.20522   |
|                                    | B(4)       | 8 <i>i</i>       | 0.83263   | 0.75000   | 0.07391   | 0.83208   | 0.75000   | 0.07394   |
|                                    | B(5)       | 8 <i>i</i>       | 0.39129   | 0.25000   | 0.36547   | 0.38985   | 0.25000   | 0.36597   |
|                                    | Mg(1)      | 4 <i>a</i>       | 0.00000   | 0.50000   | 0.00000   | 0.00000   | 0.50000   | 0.00000   |
| o-MgB <sub>12</sub> C <sub>2</sub> | Mg(2)      | 4 <i>e</i>       | 0.00000   | 0.25000   | 0.38430   | 0.00000   | 0.25000   | 0.38423   |
|                                    | B(1)       | 8 <i>h</i>       | 0.00000   | 0.33274   | 0.02107   | 0.00000   | 0.33303   | 0.02066   |
|                                    | B(2)       | 16 <i>j</i>      | 0.16176   | 0.43614   | 0.16054   | 0.16150   | 0.43627   | 0.16042   |
|                                    | B(3)       | 16 <i>j</i>      | 0.76069   | 0.91504   | 0.44807   | 0.76053   | 0.91501   | 0.44795   |
|                                    | B(4)       | 8 <i>h</i>       | 0.50000   | 0.90606   | 0.31860   | 0.50000   | 0.90637   | 0.31848   |
|                                    | C          | 8 <i>h</i>       | 0.50000   | 0.83785   | 0.12929   | 0.50000   | 0.83785   | 0.12909   |
| $\gamma$ -B <sub>28</sub>          | Mg         | 4 <i>e</i>       | 0.00000   | 0.25000   | 0.36187   | 0.00000   | 0.25000   | 0.36041   |
|                                    | B(1)       | 4 <i>g</i>       | 0.33620   | 0.50760   | 0.00000   | 0.33570   | 0.50771   | 0.00000   |
|                                    | B(2)       | 8 <i>h</i>       | 0.83910   | 0.71890   | 0.87370   | 0.83904   | 0.71918   | 0.87478   |
|                                    | B(3)       | 8 <i>h</i>       | 0.15390   | 0.59380   | 0.79240   | 0.15301   | 0.59300   | 0.79215   |
|                                    | B(4)       | 4 <i>g</i>       | 0.64690   | 0.72840   | 0.50000   | 0.64779   | 0.72925   | 0.50000   |
| B(5)                               | 4 <i>g</i> | 0.66900          | 0.98230   | 0.00000   | 0.66966   | 0.98090   | 0.00000   |           |

Table S3: Chemical shift parameters  $\delta_{\text{iso}}$ ,  $\delta_{\text{csa}}$  in ppm and  $\eta_{\text{cs}}$  without macroscopic correction of magnetic susceptibility<sup>a</sup> together with corresponding susceptibilities  $\chi$ .<sup>[1]</sup> All values according to PAW PPs.

| compound                           | site | without correction <sup>a</sup> |                       |                    | $-\chi$                  |                                     |
|------------------------------------|------|---------------------------------|-----------------------|--------------------|--------------------------|-------------------------------------|
|                                    |      | $\delta_{\text{iso}}$           | $\delta_{\text{csa}}$ | $\eta_{\text{cs}}$ | $((8\pi/3) \text{ ppm})$ | $(10^{-6} \text{ cm}^3/\text{mol})$ |
| MgB <sub>7</sub>                   | B(1) | 11.9                            | 12.9                  | 0.22               | 13.4                     | 244.4                               |
|                                    | B(2) | 23.4                            | 18.2                  | 0.93               |                          |                                     |
|                                    | B(3) | 27.3                            | 17.4                  | 0.97               |                          |                                     |
|                                    | B(4) | 49.2                            | 2.4                   | 0.35               |                          |                                     |
|                                    | B(5) | -20.9                           | 15.0                  | 0.23               |                          |                                     |
| o-MgB <sub>12</sub> C <sub>2</sub> | B(1) | 1.1                             | 18.2                  | 0.23               | 13.9                     | 219.2                               |
|                                    | B(2) | 10.0                            | -14.9                 | 0.97               |                          |                                     |
|                                    | B(3) | 24.4                            | -11.2                 | 0.49               |                          |                                     |
|                                    | B(4) | 50.4                            | -10.7                 | 0.54               |                          |                                     |
| $\gamma$ -B <sub>28</sub>          | B(1) | 17.7                            | -13.5                 | 0.94               | 15.8                     | 225.6                               |
|                                    | B(2) | 7.6                             | -25.9                 | 0.90               |                          |                                     |
|                                    | B(3) | 21.4                            | 10.2                  | 0.70               |                          |                                     |
|                                    | B(4) | 23.3                            | -11.4                 | 0.09               |                          |                                     |
|                                    | B(5) | 23.4                            | 20.3                  | 0.66               |                          |                                     |

<sup>a</sup> correction term given by  $\sigma(\mathbf{G} = \mathbf{0}) = -(8\pi/3)\chi$ .<sup>[2]</sup>

Table S4: Parameters used for spectrum simulation (beside PAW calculated values) with relative intensity  $I$ , gaussian/lorentzian width  $w$ , approximated relative area  $A$  and occupied site multiplicity. Overall distribution of gaussian to lorentzian line type was assumed to be 50 %.

| compound                           | site | $I$ (%) | $w$ (ppm)       | $A$ (%)        | occ. (%) |
|------------------------------------|------|---------|-----------------|----------------|----------|
| MgB <sub>7</sub>                   | B(1) | 10.8    | $8.0 \pm 1.4$   | $13.0 \pm 2.3$ | 14.3     |
|                                    | B(2) | 13.8    | $14.0 \pm 0.6$  | $28.0 \pm 1.2$ | 28.6     |
|                                    | B(3) | 13.8    | $14.0 \pm 0.6$  | $28.0 \pm 1.2$ | 28.6     |
|                                    | B(4) | 34.9    | $3.0 \pm 0.9$   | $15.0 \pm 4.4$ | 14.3     |
|                                    | B(5) | 26.7    | $4.0 \pm 0.1$   | $16.0 \pm 0.5$ | 14.3     |
| o-MgB <sub>12</sub> C <sub>2</sub> | B(1) | 5.6     | $33.0 \pm 11.5$ | $18.0 \pm 6.4$ | 16.7     |
|                                    | B(2) | 24.4    | $13.0 \pm 1.2$  | $31.0 \pm 2.8$ | 33.3     |
|                                    | B(3) | 33.8    | $10.0 \pm 0.1$  | $33.0 \pm 0.4$ | 33.3     |
|                                    | B(4) | 36.1    | $5.0 \pm 0.2$   | $18.0 \pm 0.9$ | 16.7     |

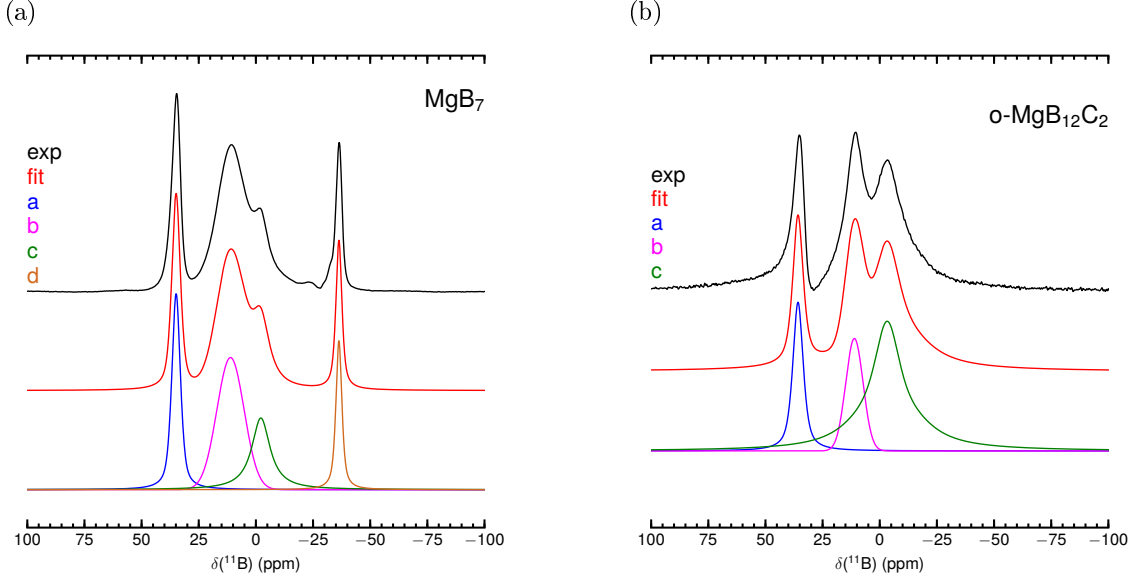

Figure S1: Central transition fits applying the “Gaus/Lor” model in the DMfit program<sup>[3]</sup> to the recorded spectra of (a) MgB<sub>7</sub> and (b) o-MgB<sub>12</sub>C<sub>2</sub>: For MgB<sub>7</sub> we obtain  $I_a : I_b : I_c : I_d = 35.7 \pm 0.2 \% : 24.1 \pm 0.1 \% : 13.1 \pm 0.2 \% : 27.1 \pm 0.2 \%$ , the shifts  $\delta_{\text{ctf}}^a = 34.9 \text{ ppm} \pm 0.2 \%$ ,  $\delta_{\text{ctf}}^b = 11.1 \text{ ppm} \pm 2.8 \%$ ,  $\delta_{\text{ctf}}^c = -2.2 \text{ ppm} \pm 25.6 \%$ ,  $\delta_{\text{ctf}}^d = -36.3 \text{ ppm} \pm 0.3 \%$ , the widths  $w_a = 4.4 \text{ ppm} \pm 0.6 \%$ ,  $w_b = 14.0 \text{ ppm} \pm 0.5 \%$ ,  $w_c = 9.6 \text{ ppm} \pm 2.0 \%$ ,  $w_d = 3.1 \text{ ppm} \pm 1.1 \%$  with the distribution of gaussian compared to lorentzian line type  $x_a = 44 \%$ ,  $x_b = 100 \%$  (full gaussian),  $x_c = 0 \%$  (full lorentzian) and  $x_d = 32 \%$ ; For o-MgB<sub>12</sub>C<sub>2</sub> the fit yields  $I_a : I_b : I_c = 38.0 \pm 0.5 \% : 28.8 \pm 0.5 \% : 33.2 \pm 0.4 \%$ , the shifts  $\delta_{\text{ctf}}^a = 35.8 \text{ ppm} \pm 0.9 \%$ ,  $\delta_{\text{ctf}}^b = 11.1 \text{ ppm} \pm 5.7 \%$ ,  $\delta_{\text{ctf}}^c = -3.3 \text{ ppm} \pm 34.3 \%$ , the widths  $w_a = 5.4 \text{ ppm} \pm 2.1 \%$ ,  $w_b = 8.9 \text{ ppm} \pm 1.8 \%$ ,  $w_c = 16.8 \text{ ppm} \pm 2.4 \%$  with the distribution of gaussian compared to lorentzian line type  $x_a = 34 \%$ ,  $x_b = 100 \%$  (full gaussian) and  $x_c = 33 \%$ .

Table S5: Euler angles  $\alpha$ ,  $\beta$  and  $\gamma$  in  $^\circ$  correspond to the calculated magnetic shielding principal axis system relative to the principal axis system of the electric field gradient tensor obtained by MagresView.<sup>[4]</sup> Values follow the ZYZ convention according to the book of M. E. Rose, Elementary Theory of Angular Momentum, Wiley, New York, 1957.

| compound                           | site | NC       |         |          | PAW      |         |          |
|------------------------------------|------|----------|---------|----------|----------|---------|----------|
|                                    |      | $\alpha$ | $\beta$ | $\gamma$ | $\alpha$ | $\beta$ | $\gamma$ |
| MgB <sub>7</sub>                   | B(1) | 0        | 173     | 90       | 0        | 173     | -90      |
|                                    | B(2) | -100     | 36      | 143      | -101     | 35      | 144      |
|                                    | B(3) | -93      | 67      | -92      | -93      | 66      | -92      |
|                                    | B(4) | 179      | 162     | -1       | -180     | 72      | 0        |
|                                    | B(5) | -90      | 100     | 0        | -90      | 100     | 0        |
| o-MgB <sub>12</sub> C <sub>2</sub> | B(1) | 90       | 138     | -180     | 90       | 138     | -180     |
|                                    | B(2) | 129      | 87      | -44      | 130      | 88      | -43      |
|                                    | B(3) | 17       | 99      | -100     | 19       | 99      | -102     |
|                                    | B(4) | 180      | 22      | 0        | 180      | 21      | 0        |
| $\gamma$ -B <sub>28</sub>          | B(1) | 90       | 106     | 90       | 90       | 106     | 90       |
|                                    | B(2) | 101      | 60      | -138     | 100      | 58      | -136     |
|                                    | B(3) | -119     | 91      | 116      | -121     | 90      | 117      |
|                                    | B(4) | 90       | 101     | 90       | 90       | 101     | 90       |
|                                    | B(5) | 90       | 35      | 180      | 90       | 34      | -180     |

Table S6: Additional information of geometry related angles (Table 6 of the manuscript) in  $^\circ$  with root-mean-square deviation (rmsd)  $\theta_{\text{rmsd}}$  of  $\theta_{\text{av}}$  and  $\theta'_{\text{rmsd}}$  of  $\theta'_{\text{av}}$ , respectively. All values correspond to optimized geometry.

| compound                                         | site | $\theta_{\text{rmsd}}$ | $\theta'_{\text{rmsd}}$ |
|--------------------------------------------------|------|------------------------|-------------------------|
| MgB <sub>7</sub>                                 | B(1) | 1.35                   | 1.22                    |
|                                                  | B(2) | 0.93                   | 0.86                    |
|                                                  | B(3) | 1.27                   | 0.98                    |
|                                                  | B(4) | 0.79                   | 0.46                    |
| o-MgB <sub>12</sub> C <sub>2</sub>               | B(1) | 0.77                   | 0.70                    |
|                                                  | B(2) | 1.14                   | 0.87                    |
|                                                  | B(3) | 0.59                   | 0.36                    |
|                                                  | B(4) | 1.13                   | 0.56                    |
| $\gamma$ -B <sub>28</sub>                        | B(1) | 0.22                   | 0.24                    |
|                                                  | B(2) | 0.67                   | 0.32                    |
|                                                  | B(3) | 0.33                   | 0.30                    |
|                                                  | B(4) | 0.63                   | 0.19                    |
| (B <sub>12</sub> H <sub>12</sub> ) <sup>2-</sup> |      | 0.00                   | 0.00                    |

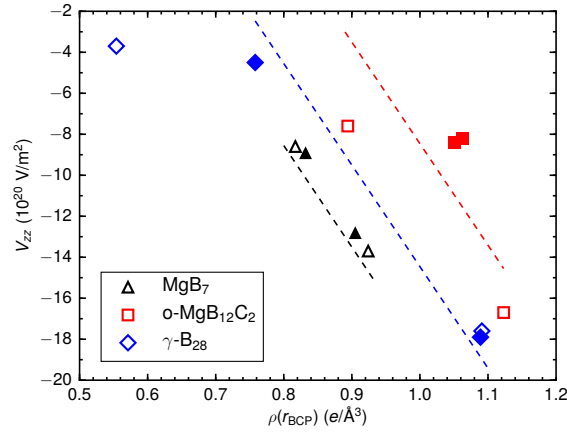

Figure S2: Values of the EFG main component  $V_{zz}$  from PAW calculations plotted against  $\rho(r_{\text{BCP}})$  of B sites B(1) to B(4) in the icosahedral B<sub>12</sub> units with data from Tables 3 and 6 of the manuscript. The properties of the BCPs are associated with the exohedral bonds and in accordance to the orientation of the  $V_{zz}$  axis. Filled squares correspond to properties of sites bonded to the interstitial unit. The trend lines are meant to guide the eye.

## References

- [1] F. Mauri and S. G. Louie, *Phys. Rev. Lett.*, 1996, **76**, 4246–4249.
- [2] F. Mauri, B. G. Pfrommer and S. G. Louie, *Phys. Rev. Lett.*, 1996, **77**, 5300–5303.
- [3] D. Massiot, F. Fayon, M. Capron, I. King, S. Le Calvé, B. Alonso, J.-O. Durand, B. Bujoli, Z. Gan and G. Hoatson, *Magn. Reson. Chem.*, 2002, **40**, 70–76.
- [4] S. Sturniolo, T. F. Green, R. M. Hanson, M. Zilka, K. Refson, P. Hodgkinson, S. P. Brown and J. R. Yates, *Solid State Nucl. Mag.*, 2016, **78**, 64–70.
